# Supplementary material
Source: Springer Nature journal article supplement (https://www.springermedizin.de/resource/supplementary/13020_2010_85_MOESM3_ESM.pdf/9640956)

Extracellular matrix

Cytoplasm

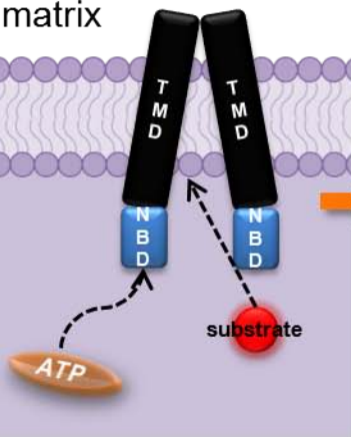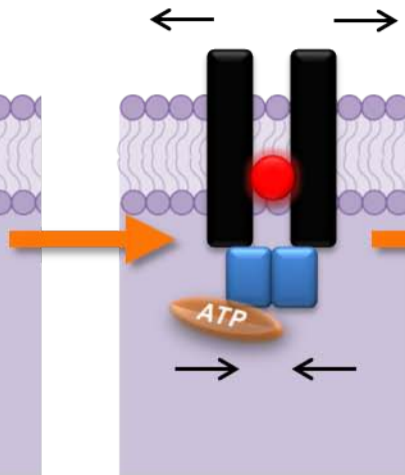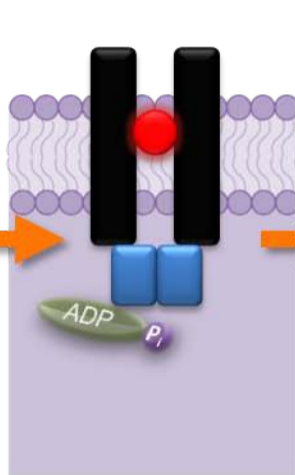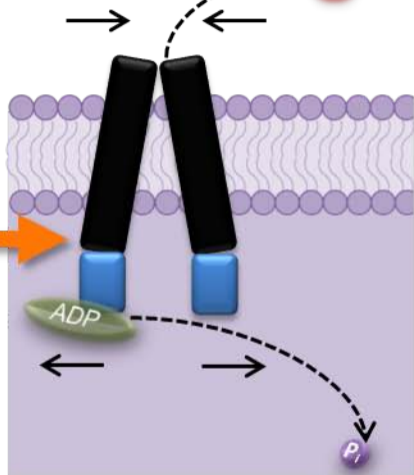

Supplement: MOESM3 [file 9640956]
